# Supplementary material for: Development and Validation of a Brief Version of the Research Engagement Survey Tool
Source: MDPI journal article supplement (doi:10.3390/ijerph181910020), 2021-09-23
Supplement: s1 [file s1]

**Table S1.** Comparison Measures

| <b>Name</b>                                                    | <b>Domain</b>                                                             | <b>Longitudinal survey</b> | <b>Number of items</b> | <b>Scoring/interpretation</b>                                               | <b>Validation (if applicable)</b>                                     |
|----------------------------------------------------------------|---------------------------------------------------------------------------|----------------------------|------------------------|-----------------------------------------------------------------------------|-----------------------------------------------------------------------|
| Mainous Trust in Medical Researchers [10]                      | Trust in medical researchers                                              | 1                          | 12                     | Score ranging from 0 to 48; higher values indicate higher trust             | Cronbach's alpha = 0.84                                               |
| Hall Trust in Medical Researchers [11]                         | Trust in medical researchers                                              | 1                          | 12                     | Score ranging from 0 to 100; higher values indicate higher trust            | Cronbach's alpha = 0.87. Factor model consists of 1 factor.           |
| Survey of community engagement [12]                            | Community engagement                                                      | 1                          | 3 categories; 25 items | Average score ranging from 1 to 7; higher scores indicate higher engagement | n/a                                                                   |
| Partnership Assessment In community-based Research (PAIR) [13] | Evaluates key dimensions of researchers and community member partnerships | 1                          | 5 dimensions; 31 items | Average score ranging from 1 to 5; higher scores indicate higher engagement | Content validation (literature review, experts, cognitive interviews) |
| Community Engagement Research Index (CERI) [14]                | Community engagement in research                                          | 2                          | 12                     | Sum score ranging from 4 to 12; higher scores indicate                      | Face validity (items identified by interview participants), content   |

**Table S1.** Comparison Measures

| <b>Name</b>                                                    | <b>Domain</b>                 | <b>Longitudinal survey</b> | <b>Number of items</b>  | <b>Scoring/interpretation</b>                                                            | <b>Validation (if applicable)</b>                                                                                                                            |
|----------------------------------------------------------------|-------------------------------|----------------------------|-------------------------|------------------------------------------------------------------------------------------|--------------------------------------------------------------------------------------------------------------------------------------------------------------|
|                                                                |                               |                            |                         | higher engagement                                                                        | validity (items based on previously collected qualitative data)                                                                                              |
| Coalition Self-Assessment Survey (CSAS) trust sub-scale        | Trust within coalition        | 2                          | 7                       | Average score ranging from 1 to 4; higher scores indicate higher trust                   | No validation data, but used across several projects                                                                                                         |
| The Community Campus Partnerships for Health (CCPH) principles | Community campus partnerships | 2                          | 10 principles; 47 items |                                                                                          | No validation data, but used across several projects                                                                                                         |
| Partnership Self-Assessment Tool (PSAT) – Synergy              | Partnership synergy           | 3                          | 9                       | Average score ranging from 1 to 5, rounded to 0.1; higher scores indicate higher synergy | According to the National Collaborating Centre for Methods and Tools (NCCMT), the PSAT tool has been evaluated, validity properties meet accepted standards, |
| Partnership Self-Assessment Tool (PSAT) – Leadership           | Partnership leadership        | 3                          | 11                      | Average score ranging from 1 to 5, rounded to 0.1; higher scores                         |                                                                                                                                                              |

**Table S1.** Comparison Measures

| <b>Name</b>                                                         | <b>Domain</b>                         | <b>Longitudinal survey</b> | <b>Number of items</b> | <b>Scoring/interpretation</b>                                                                              | <b>Validation (if applicable)</b>                                                                        |
|---------------------------------------------------------------------|---------------------------------------|----------------------------|------------------------|------------------------------------------------------------------------------------------------------------|----------------------------------------------------------------------------------------------------------|
|                                                                     |                                       |                            |                        | indicate better leadership                                                                                 | and reliability properties meet accepted standards. They gave the tool a 'strong' methodological rating. |
| Partnership Self-Assessment Tool (PSAT) – Efficiency                | Partnership Efficiency                | 3                          | 3                      | Average score ranging from 1 to 5, rounded to 0.1; higher scores indicate better efficiency                |                                                                                                          |
| Partnership Self-Assessment Tool (PSAT) – Administration/Management | Partnership administration/management | 3                          | 9                      | Average score ranging from 1 to 5, rounded to 0.1; higher scores indicate better administration/management |                                                                                                          |
| Partnership Self-Assessment Tool (PSAT) – nonfinancial resources    | Partnership nonfinancial resources    | 3                          | 6                      | Average score ranging from 1 to 5, rounded to 0.1; higher scores indicate has resources                    |                                                                                                          |
| Partnership Self-Assessment Tool (PSAT) other                       | Partnership financial other           | 3                          | 3                      | Average score ranging from 1 to 5, rounded to                                                              |                                                                                                          |

**Table S1.** Comparison Measures

| <b>Name</b>                                                               | <b>Domain</b>                             | <b>Longitudinal survey</b> | <b>Number of items</b> | <b>Scoring/interpretation</b>                                                                                               | <b>Validation (if applicable)</b> |
|---------------------------------------------------------------------------|-------------------------------------------|----------------------------|------------------------|-----------------------------------------------------------------------------------------------------------------------------|-----------------------------------|
| – financial<br>other capital<br>resources                                 | capital<br>resources                      |                            |                        | 0.1; higher<br>scores<br>indicate has<br>resources                                                                          |                                   |
| Partnership<br>Self-<br>Assessment<br>Tool (PSAT)<br>– decision<br>making | Partnership<br>decision<br>making         | 3                          | 3                      | Average<br>score ranging<br>from 1 to 5,<br>rounded to<br>0.1; higher<br>scores<br>indicate<br>better<br>decision<br>making |                                   |
| Partnership<br>Self-<br>Assessment<br>Tool (PSAT)<br>– benefits           | Partnership<br>benefits                   | 3                          | 11                     | Percentage<br>score (out of<br>nonmissing<br>items);<br>higher score<br>indicates<br>more benefits                          |                                   |
| Partnership<br>self-<br>assessment<br>tool (PSAT) –<br>Drawbacks          | Partnership<br>drawbacks                  | 3                          | 6                      | Percentage<br>score (out of<br>nonmissing<br>items);<br>higher score<br>indicates<br>more<br>drawbacks                      |                                   |
| Partnership<br>Self-<br>Assessment<br>Tool (PSAT)<br>– comparing          | Comparing<br>benefits<br>and<br>drawbacks | 3                          | 1                      | 1='Drawbacks<br>greatly exceed<br>the benefits' to<br>5='Benefits<br>greatly exceed<br>the<br>drawbacks'                    |                                   |

**Table S1.** Comparison Measures

| <b>Name</b>                                            | <b>Domain</b>            | <b>Longitudinal survey</b> | <b>Number of items</b>             | <b>Scoring/interpretation</b>                                                                                   | <b>Validation (if applicable)</b>                          |
|--------------------------------------------------------|--------------------------|----------------------------|------------------------------------|-----------------------------------------------------------------------------------------------------------------|------------------------------------------------------------|
| benefits and drawbacks                                 |                          |                            |                                    |                                                                                                                 |                                                            |
| Partnership Self-Assessment Tool (PSAT) – satisfaction | Partnership satisfaction | 3                          | 5                                  | Average score ranging from 1 to 5, rounded to 0.1; higher scores indicate higher satisfaction                   |                                                            |
| Wilder Collaboration Factors Inventory                 | Collaboration evaluation | 3                          | 6 dimensions, 20 factors, 40 items | Average score ranging from 1 to 5 with dimensions equally weighted; higher scores indicate higher collaboration | Reliability varied for dimensions (alpha 0.50 – 0.93) [19] |

**Table S2.** Factor Analysis Results – Comprehensive Version of REST

| Item Number | Item                                                                                                                                                 | Quantity (n=234) |    |    |    | Quality (n=224) |    |
|-------------|------------------------------------------------------------------------------------------------------------------------------------------------------|------------------|----|----|----|-----------------|----|
|             |                                                                                                                                                      | F1               | F2 | F3 | F4 | F1              | F2 |
| 1.1         | The focus is on problems important to the community.                                                                                                 |                  |    |    |    |                 | X  |
| 1.2         | All partners look at the data to determine the health problems the community thinks are important.                                                   | X                |    |    |    | X               |    |
| 1.3         | The effort incorporates factors (for example housing, transportation, food access, education, employment) that influence health status.              |                  |    |    | X  |                 | X  |
| 1.4         | The focus is on cultural factors that influence health behaviors.                                                                                    |                  |    |    | X  |                 | X  |
| 2.1         | All partners have the opportunity to share ideas, input, and leadership responsibilities and to share in the determination of the project structure. | X                |    |    |    | X               | X  |
| 2.2         | Plans are developed and adjusted to meet the needs and concerns of the community or patient population.                                              |                  |    |    | X  | X               | X  |
| 2.3         | All partners agree to take on specific tasks according to their comfort, ability, and expertise.                                                     | X                |    |    |    | X               |    |
| 2.4         | All partners assist in establishing roles and related responsibilities for the partnership.                                                          | X                |    |    |    | X               |    |
| 3.1         | All partners share updates, progress, strategies, and new ideas regularly.                                                                           | X                |    |    |    | X               |    |
| 3.2         | A plan is in place for ongoing problem-solving.                                                                                                      | X                |    |    |    | X               |    |
| 3.3         | All partners are involved in determining next steps.                                                                                                 | X                |    |    |    | X               |    |
| 3.4         | Community-engaged activities are continued until the goals (as agreed upon by all partners) are achieved.                                            | X                |    |    |    | X               |    |

**Table S2.** Factor Analysis Results – Comprehensive Version of REST

| Item Number | Item                                                                                                 | Quantity (n=234) |    |    |    | Quality (n=224) |    |
|-------------|------------------------------------------------------------------------------------------------------|------------------|----|----|----|-----------------|----|
|             |                                                                                                      | F1               | F2 | F3 | F4 | F1              | F2 |
| 3.5         | All partners continue community-engaged activities beyond an initial project, activity, or study.    | X                |    |    |    | X               |    |
| 4.1         | All partners have a variety of opportunities to gain new skills or knowledge from their involvement. |                  |    | X  |    |                 | X  |
| 4.2         | All partners are encouraged to learn from each other.                                                |                  |    | X  |    |                 | X  |
| 4.3         | The partnership adds value to the work of all partners.                                              |                  |    | X  |    |                 | X  |
| 4.4         | All partners share resources to increase ability to address the problem of interest.                 |                  |    | X  |    |                 | X  |
| 5.1         | The team builds on strengths and resources within the community or patient population.               |                  |    | X  |    |                 | X  |
| 5.2         | The team works with existing community groups and organizations.                                     |                  |    | X  | X  |                 | X  |
| 5.3         | The team includes representation from the local community or patient population.                     |                  |    | X  | X  |                 | X  |
| 6.1         | Fair processes have been established to manage conflict or disagreements.                            | X                |    |    |    | X               |    |
| 6.2         | All partners ideas are treated with openness and respect.                                            |                  | X  |    |    | X               |    |
| 6.3         | All partners agree on the timeline for making shared decisions about the project.                    | X                |    |    |    | X               |    |
| 6.4         | All partners agree on ownership of data for publications and presentations.                          | X                |    |    |    | X               |    |
| 7.1         | All partners can use knowledge generated from the partnership.                                       |                  |    |    |    | X               | X  |
| 7.2         | All interested partners are involved in activities related to sharing results.                       | X                |    |    |    | X               |    |

**Table S2.** Factor Analysis Results – Comprehensive Version of REST

| Item Number                   | Item                                                                                                     | Quantity (n=234) |      |      |      | Quality (n=224) |      |
|-------------------------------|----------------------------------------------------------------------------------------------------------|------------------|------|------|------|-----------------|------|
|                               |                                                                                                          | F1               | F2   | F3   | F4   | F1              | F2   |
| 7.3                           | All partners have the opportunity to be coauthors when the work is published.                            | X                | X    |      |      | X               |      |
| 8.1                           | The partnerships processes support trust among all partners.                                             |                  | X    |      |      | X               |      |
| 8.2                           | All partners are confident that they will receive credit for their contributions to the partnership.     |                  | X    |      |      | X               |      |
| 8.3                           | Mutual respect exists among all partners.                                                                |                  | X    |      |      | X               |      |
| 8.4                           | All partners respect the population being served.                                                        |                  | X    |      |      |                 | X    |
| 8.5                           | All partners understand the culture of the organizations and community(ies) involved in the partnership. |                  | X    |      |      | X               | X    |
| <i>Eigenvalue</i>             |                                                                                                          | 20.2             | 1.45 | 1.18 | 1.03 | 22.9            | 1.08 |
| <i>Variance Accounted for</i> |                                                                                                          | 0.63             | 0.05 | 0.04 | 0.03 | 0.72            | 0.03 |



**Table S3.** Item Response Theory Results – Comprehensive Version of REST

| Item Number <sup>a</sup> | Quality   |            |                     | Quantity  |            |                     |
|--------------------------|-----------|------------|---------------------|-----------|------------|---------------------|
|                          | IRT slope | Slope rank | IRT threshold range | IRT slope | Slope rank | IRT threshold range |
| 1.1                      | 1.34      | 23         | 3.24                | 1.05      | 25         | 3.77                |
| 1.2                      | 1.28      | 28         | 2.84                | 0.95      | 30         | 3.53                |
| 1.3                      | 1.23      | 31         | 3.13                | 0.96      | 29         | 3.66                |
| 1.4                      | 1.30      | 27         | 2.88                | 0.92      | 32         | 4.12                |
| 2.1                      | 1.72      | 4          | 2.48                | 1.34      | 17         | 3.50                |
| 2.2                      | 1.69      | 5          | 2.83                | 1.61      | 2          | 3.11                |
| 2.3                      | 1.51      | 18         | 3.00                | 0.98      | 27         | 3.20                |
| 2.4                      | 1.56      | 14         | 3.04                | 1.43      | 7          | 2.93                |
| 3.1                      | 1.54      | 16         | 2.99                | 1.37      | 15         | 2.91                |
| 3.2                      | 1.60      | 9          | 2.63                | 1.36      | 16         | 2.99                |
| 3.3                      | 1.64      | 6          | 2.58                | 1.53      | 5          | 3.32                |
| 3.4                      | 1.84      | 1          | 2.52                | 1.58      | 3          | 2.65                |
| 3.5                      | 1.47      | 19         | 2.45                | 1.09      | 24         | 3.05                |
| 4.1                      | 1.64      | 7          | 2.77                | 1.21      | 21         | 3.49                |
| 4.2                      | 1.57      | 12         | 2.71                | 1.29      | 19         | 3.09                |
| 4.3                      | 1.60      | 8          | 2.92                | 1.41      | 10         | 3.10                |
| 4.4                      | 1.47      | 21         | 2.82                | 1.38      | 13         | 2.96                |
| 5.1                      | 1.72      | 3          | 2.61                | 1.54      | 4          | 2.51                |
| 5.2                      | 1.33      | 25         | 2.69                | 0.98      | 28         | 3.16                |
| 5.3                      | 1.24      | 30         | 3.26                | 0.92      | 31         | 3.63                |
| 6.1                      | 1.34      | 24         | 2.92                | 1.24      | 20         | 3.01                |
| 6.2                      | 1.54      | 17         | 2.79                | 1.42      | 9          | 3.49                |
| 6.3                      | 1.58      | 11         | 3.06                | 1.40      | 11         | 3.66                |
| 6.4                      | 1.47      | 20         | 2.87                | 1.31      | 18         | 2.82                |
| 7.1                      | 1.45      | 22         | 2.65                | 1.44      | 6          | 2.71                |
| 7.2                      | 1.60      | 10         | 2.38                | 1.43      | 8          | 2.49                |
| 7.3                      | 1.17      | 32         | 2.46                | 1.01      | 26         | 3.03                |
| 8.1                      | 1.84      | 2          | 2.70                | 1.80      | 1          | 2.91                |
| 8.2                      | 1.55      | 15         | 2.33                | 1.37      | 14         | 2.50                |
| 8.3                      | 1.56      | 13         | 3.01                | 1.39      | 12         | 2.76                |
| 8.4                      | 1.24      | 29         | 2.95                | 1.20      | 22         | 2.74                |
| 8.5                      | 1.31      | 26         | 2.82                | 1.18      | 23         | 3.13                |

Abbreviation: IRT, item response theory.

<sup>a</sup>See Table S2 for wording of full item.

**Table S4.** Comprehensive REST Item Information Summary

| Item Number | Item text                                                                                                                                            | Quantity |         |        |                |         | Quality |         |        |                |         |
|-------------|------------------------------------------------------------------------------------------------------------------------------------------------------|----------|---------|--------|----------------|---------|---------|---------|--------|----------------|---------|
|             |                                                                                                                                                      | Mean     | Std dev | Median | Not applicable |         | Mean    | Std dev | Median | Not applicable |         |
|             |                                                                                                                                                      |          |         |        | N              | Percent |         |         |        | N              | Percent |
| 1.1         | The focus is on problems important to the community.                                                                                                 | 4.10     | 0.85    | 4.0    | 3.0            | 0.9     | 3.73    | 1.03    | 4.0    | 5.0            | 1.5     |
| 1.2         | All partners look at the data to determine the health problems the community thinks are important.                                                   | 3.80     | 1.01    | 4.0    | 13.0           | 3.9     | 3.61    | 1.13    | 4.0    | 13.0           | 3.9     |
| 1.3         | The effort incorporates factors (for example housing, transportation, food access, education, employment) that influence health status.              | 3.90     | 0.96    | 4.0    | 18.0           | 5.4     | 3.62    | 1.11    | 4.0    | 24.0           | 7.1     |
| 1.4         | The focus is on cultural factors that influence health behaviors.                                                                                    | 3.90     | 0.96    | 4.0    | 15.0           | 4.5     | 3.66    | 1.10    | 4.0    | 13.0           | 3.9     |
| 2.1         | All partners have the opportunity to share ideas, input, and leadership responsibilities and to share in the determination of the project structure. | 3.88     | 0.98    | 4.0    | 12.0           | 3.6     | 3.61    | 1.11    | 4.0    | 13.0           | 3.9     |
| 2.2         | Plans are developed and adjusted to meet the needs and concerns of the                                                                               | 3.95     | 0.96    | 4.0    | 12.0           | 3.6     | 3.70    | 1.09    | 4.0    | 12.0           | 3.6     |

**Table S4.** Comprehensive REST Item Information Summary

| Item Number | Item text                                                                                                                            | Quantity |         |        |                |         | Quality |         |        |                |         |
|-------------|--------------------------------------------------------------------------------------------------------------------------------------|----------|---------|--------|----------------|---------|---------|---------|--------|----------------|---------|
|             |                                                                                                                                      | Mean     | Std dev | Median | Not applicable |         | Mean    | Std dev | Median | Not applicable |         |
|             |                                                                                                                                      |          |         |        | N              | Percent |         |         |        | N              | Percent |
| 2.3         | community or patient population.<br>All partners agree to take on specific tasks according to their comfort, ability, and expertise. | 3.90     | 0.96    | 4.0    | 10.0           | 3.0     | 3.61    | 1.07    | 4.0    | 11.0           | 3.3     |
| 2.4         | All partners assist in establishing roles and related responsibilities for the partnership.                                          | 3.81     | 0.96    | 4.0    | 8.0            | 2.4     | 3.51    | 1.06    | 4.0    | 9.0            | 2.7     |
| 3.1         | All partners share updates, progress, strategies, and new ideas regularly.                                                           | 3.82     | 1.05    | 4.0    | 7.0            | 2.1     | 3.57    | 1.09    | 4.0    | 13.0           | 3.9     |
| 3.2         | A plan is in place for ongoing problem-solving.                                                                                      | 3.72     | 1.06    | 4.0    | 13.0           | 3.9     | 3.49    | 1.16    | 4.0    | 13.0           | 3.9     |
| 3.3         | All partners are involved in determining next steps.                                                                                 | 3.65     | 1.02    | 4.0    | 10.0           | 3.0     | 3.41    | 1.18    | 3.0    | 11.0           | 3.3     |
| 3.4         | Community-engaged activities are continued until the goals (as agreed upon by all partners) are achieved.                            | 3.75     | 1.09    | 4.0    | 10.0           | 3.0     | 3.53    | 1.16    | 4.0    | 10.0           | 3.0     |
| 3.5         | All partners continue community-engaged activities beyond an initial project, activity, or study.                                    | 3.59     | 1.11    | 4.0    | 22.0           | 6.5     | 3.42    | 1.21    | 4.0    | 20.0           | 6.0     |
| 4.1         | All partners have a variety of opportunities to gain                                                                                 | 3.80     | 0.95    | 4.0    | 4.0            | 1.2     | 3.56    | 1.09    | 4.0    | 8.0            | 2.4     |

**Table S4.** Comprehensive REST Item Information Summary

| Item Number | Item text                                                                                             | Quantity |         |        |                |         | Quality |         |        |                |         |
|-------------|-------------------------------------------------------------------------------------------------------|----------|---------|--------|----------------|---------|---------|---------|--------|----------------|---------|
|             |                                                                                                       | Mean     | Std dev | Median | Not applicable |         | Mean    | Std dev | Median | Not applicable |         |
|             |                                                                                                       |          |         |        | N              | Percent |         |         |        | N              | Percent |
| 4.2         | new skills or knowledge from their involvement. All partners are encouraged to learn from each other. | 4.02     | 0.99    | 4.0    | 4.0            | 1.2     | 3.68    | 1.11    | 4.0    | 6.0            | 1.8     |
| 4.3         | The partnership adds value to the work of all partners.                                               | 4.02     | 0.96    | 4.0    | 4.0            | 1.2     | 3.76    | 1.08    | 4.0    | 5.0            | 1.5     |
| 4.4         | All partners share resources to increase ability to address the problem of interest.                  | 3.80     | 1.01    | 4.0    | 7.0            | 2.1     | 3.65    | 1.09    | 4.0    | 12.0           | 3.6     |
| 5.1         | The team builds on strengths and resources within the community or patient population.                | 3.88     | 1.05    | 4.0    | 9.0            | 2.7     | 3.61    | 1.11    | 4.0    | 11.0           | 3.3     |
| 5.2         | The team works with existing community groups and organizations.                                      | 4.08     | 0.98    | 4.0    | 6.0            | 1.8     | 3.76    | 1.13    | 4.0    | 8.0            | 2.4     |
| 5.3         | The team includes representation from the local community or patient population.                      | 3.91     | 0.99    | 4.0    | 10.0           | 3.0     | 3.68    | 1.11    | 4.0    | 16.0           | 4.8     |
| 6.1         | Fair processes have been established to manage conflict or disagreements.                             | 3.71     | 1.06    | 4.0    | 21.0           | 6.3     | 3.48    | 1.14    | 4.0    | 24.0           | 7.1     |

**Table S4.** Comprehensive REST Item Information Summary

| Item Number | Item text                                                                                            | Quantity |         |        |                |         | Quality |         |        |                |         |
|-------------|------------------------------------------------------------------------------------------------------|----------|---------|--------|----------------|---------|---------|---------|--------|----------------|---------|
|             |                                                                                                      | Mean     | Std dev | Median | Not applicable |         | Mean    | Std dev | Median | Not applicable |         |
|             |                                                                                                      |          |         |        | N              | Percent |         |         |        | N              | Percent |
| 6.2         | All partners' ideas are treated with openness and respect.                                           | 4.08     | 0.91    | 4.0    | 3.0            | 0.9     | 3.69    | 1.09    | 4.0    | 7.0            | 2.1     |
| 6.3         | All partners agree on the timeline for making shared decisions about the project.                    | 3.83     | 0.92    | 4.0    | 10.0           | 3.0     | 3.54    | 1.07    | 4.0    | 13.0           | 3.9     |
| 6.4         | All partners agree on ownership of data for publications and presentations.                          | 3.78     | 1.07    | 4.0    | 25.0           | 7.4     | 3.51    | 1.14    | 4.0    | 22.0           | 6.5     |
| 7.1         | All partners can use knowledge generated from the partnership.                                       | 4.07     | 0.97    | 4.0    | 7.0            | 2.1     | 3.75    | 1.11    | 4.0    | 8.0            | 2.4     |
| 7.2         | All interested partners are involved in activities related to sharing results.                       | 3.76     | 1.09    | 4.0    | 9.0            | 2.7     | 3.63    | 1.17    | 4.0    | 10.0           | 3.0     |
| 7.3         | All partners have the opportunity to be coauthors when the work is published.                        | 3.47     | 1.19    | 4.0    | 36.0           | 10.7    | 3.20    | 1.32    | 3.0    | 41.0           | 12.2    |
| 8.1         | The partnership's processes support trust among all partners.                                        | 3.89     | 0.95    | 4.0    | 9.0            | 2.7     | 3.65    | 1.11    | 4.0    | 9.0            | 2.7     |
| 8.2         | All partners are confident that they will receive credit for their contributions to the partnership. | 3.71     | 1.13    | 4.0    | 18.0           | 5.4     | 3.46    | 1.25    | 4.0    | 19.0           | 5.7     |

**Table S4.** Comprehensive REST Item Information Summary

| Item Number | Item text                                                                                                | Quantity |         |        |                |         | Quality |         |        |                |         |
|-------------|----------------------------------------------------------------------------------------------------------|----------|---------|--------|----------------|---------|---------|---------|--------|----------------|---------|
|             |                                                                                                          | Mean     | Std dev | Median | Not applicable |         | Mean    | Std dev | Median | Not applicable |         |
|             |                                                                                                          |          |         |        | N              | Percent |         |         |        | N              | Percent |
| 8.3         | Mutual respect exists among all partners.                                                                | 3.96     | 0.99    | 4.0    | 6.0            | 1.8     | 3.75    | 1.07    | 4.0    | 7.0            | 2.1     |
| 8.4         | All partners respect the population being served.                                                        | 4.12     | 0.98    | 4.0    | 8.0            | 2.4     | 3.90    | 1.08    | 4.0    | 8.0            | 2.4     |
| 8.5         | All partners understand the culture of the organizations and community(ies) involved in the partnership. | 3.78     | 1.02    | 4.0    | 7.0            | 2.1     | 3.67    | 1.12    | 4.0    | 9.0            | 2.7     |
